# Supplementary material for: Synthesis of poly(L-Lactide)–Poly(-Caprolactone)–Poly(ethylene Glycol) Terpolymer Grafted onto Partially Oxidized Carbon Nanotube Nanocomposites for Drug Delivery
Source: Preprints.org preprint supplement (doi:10.20944/preprints202408.1347.v1), 2024-08-19
Supplement: Supplementary file 1 [file supplementary]

Synthesis of poly(L-lactide)–poly(-caprolactone)–poly(ethylene glycol) terpolymer grafted onto partially oxidized carbon nanotube nanocomposites for drug delivery

**Karla J. González-Iñiguez, Edgar B. Figueroa-Ochoa, Antonio Martínez-Richa, Leonardo R. Cajero-Zul and Sergio M. Nuño-Donlucas**

**Supplementary material**

Figure S1. DSC thermograms of pure PEG (A), PCL 4 (B), and PLLA 1 (C).
